# Supplementary material for: The Multimorbidity and Lifestyle Correlates in Chinese Population Residing in Macau: Findings from a Community-Based Needs Assessment Study
Source: MDPI journal article supplement (doi:10.3390/healthcare11131906), 2023-06-30
Supplement: s1 [file s1]

---

## Supplementary Materials

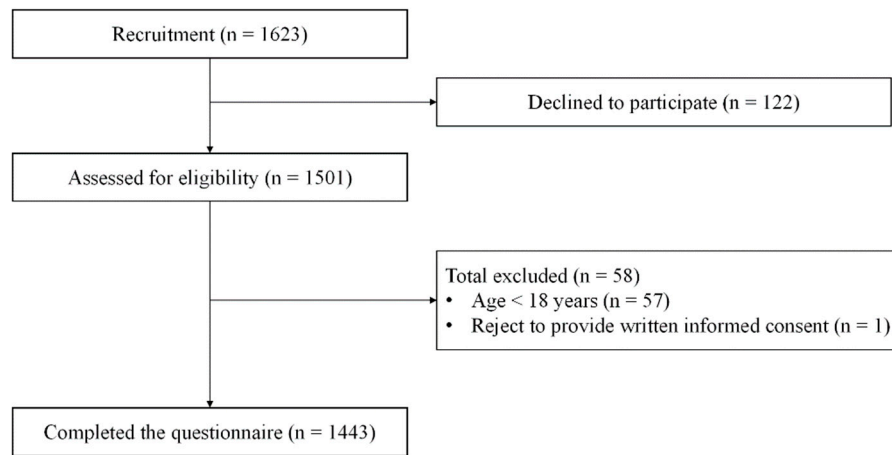

**Figure S1.** Study flow diagram.

---

**Table S1.** Sample estimation in each age group with reference to Macau Census data.

| Age group | Macau Census data |        |        | Sample estimation |     |       |
|-----------|-------------------|--------|--------|-------------------|-----|-------|
|           | Overall           | Men    | Women  | Overall           | Men | Women |
| 18-24     | 65849             | 36121  | 29728  | 129               | 71  | 58    |
| 25-34     | 135016            | 67321  | 67695  | 265               | 132 | 133   |
| 35-44     | 101537            | 48367  | 53170  | 200               | 95  | 105   |
| 45-54     | 104006            | 45528  | 58478  | 204               | 89  | 115   |
| 55-64     | 87583             | 42879  | 44704  | 172               | 84  | 88    |
| >=65      | 59383             | 28167  | 31216  | 117               | 55  | 62    |
| Total     | 553374            | 268383 | 284991 | 1087              | 526 | 561   |

Ref: Detailed Results of 2016 Population By-Census of Macau.

**Table S2.** Associations between lifestyle factors and lifestyle score and multimorbidity among Macau population stratified by gender.

| Lifestyle characteristics               | Multimorbidity,<br>cases (%) | Men               |             |                   |             |
|-----------------------------------------|------------------------------|-------------------|-------------|-------------------|-------------|
|                                         |                              | Model 1           |             | Model 2           |             |
|                                         |                              | OR (95% CI)       | P-<br>value | OR (95% CI)       | P-<br>value |
|                                         |                              | Model 2a          |             |                   |             |
| <b>BMI category</b>                     |                              |                   |             |                   |             |
| Underweight/Normal weight (<23.0 kg/m2) | 24 (6.7)                     | Ref               | -           | Ref               | -           |
| Overweight (23-24.9 kg/m2)              | 18 (11.5)                    | 1.81 (0.95, 3.44) | 0.07        | 1.55 (0.73, 3.29) | 0.26        |
| Obesity (≥25 kg/m2)                     | 27 (20.3)                    | 3.53 (1.96, 6.39) | < 0.001     | 3.52 (1.69, 7.36) | < 0.001     |
| <b>VPA Weekly</b>                       |                              |                   |             |                   |             |
| Not enough (< 75 min)                   | 59 (12.4)                    | Ref               | -           | Ref               | -           |
| Enough (≥ 75 min)                       | 10 (5.9)                     | 0.45 (0.22, 0.89) | 0.02        | 0.65 (0.26, 1.59) | 0.34        |
| <b>MPA Weekly</b>                       |                              |                   |             |                   |             |
| No enough (< 150 min)                   | 54 (11.0)                    | Ref               | -           | Ref               | -           |
| Enough (≥ 150 min)                      | 15 (9.6)                     | 0.85 (0.47, 1.55) | 0.6         | 1.27 (0.58, 2.78) | 0.55        |
| <b>Drinking status</b>                  |                              |                   |             |                   |             |
| Never                                   | 27 (7.4)                     | Ref               | -           | Ref               | -           |
| Quitted                                 | 18 (26.9)                    | 4.59 (2.35, 8.94) | < 0.001     | 2.80 (1.23, 6.38) | 0.01        |
| Yes                                     | 24 (11.2)                    | 1.57 (0.88, 2.80) | 0.13        | 1.53 (0.74, 3.19) | 0.25        |
| <b>Smoking status</b>                   |                              |                   |             |                   |             |
| Never                                   | 36 (7.8)                     | Ref               | -           | Ref               | -           |
| Quitted                                 | 23 (24.7)                    | 3.87 (2.16, 6.92) | < 0.001     | 1.52 (0.74, 3.12) | 0.25        |
| Yes                                     | 10 (10.8)                    | 1.42 (0.68, 2.97) | 0.35        | 0.68 (0.27, 1.73) | 0.42        |
| <b>Insomnia (PSQI score &gt;5)</b>      |                              |                   |             |                   |             |
| Optimal ≤ 5                             | 41 (8.6)                     | Ref               | -           | Ref               | -           |
| Poor > 5                                | 28 (16.5)                    | 2.09 (1.25, 3.51) | 0.005       | 2.57 (1.33, 4.98) | 0.005       |
| <b>Model 2b</b>                         |                              |                   |             |                   |             |
| Lifestyle score                         | -                            | 0.65 (0.55, 0.76) | < 0.001     | 0.70 (0.58, 0.84) | < 0.001     |

**Table S2. Associations between lifestyle factors and lifestyle score and multimorbidity among Macau population stratified by gender (Continued)**

| Lifestyle characteristics               | Multimorbidity,<br>cases (%) | Women             |             |                   |             |
|-----------------------------------------|------------------------------|-------------------|-------------|-------------------|-------------|
|                                         |                              | Model 1           |             | Model 2           |             |
|                                         |                              | OR (95% CI)       | P-<br>value | OR (95% CI)       | P-<br>value |
|                                         |                              |                   |             |                   |             |
| Model 2a                                |                              |                   |             |                   |             |
| BMI category                            |                              |                   |             |                   |             |
| Underweight/Normal weight (<23.0 kg/m2) | 26 (5.0)                     | Ref               | -           | Ref               | -           |
| Overweight (23-24.9 kg/m2)              | 21 (16.5)                    | 3.73 (2.02, 6.89) | < 0.001     | 2.70 (1.37, 5.35) | 0.004       |
| Obesity (≥25 kg/m2)                     | 33 (21.4)                    | 5.14 (2.96, 8.92) | < 0.001     | 4.44 (2.38, 8.26) | < 0.001     |
| VPA Weekly                              |                              |                   |             |                   |             |
| Not enough (< 75 min)                   | 71 (10.4)                    | Ref               | -           | Ref               | -           |
| Enough (≥= 75 min)                      | 9 (7.7)                      | 0.71 (0.35, 1.47) | 0.36        | 1.17 (0.48, 2.86) | 0.72        |
| MPA Weekly                              |                              |                   |             |                   |             |
| Not enough (< 150 min)                  | 68 (10.4)                    | Ref               | -           | Ref               | -           |
| Enough (≥= 150 min)                     | 12 (8.3)                     | 0.77 (0.41, 1.47) | 0.44        | 0.73 (0.32, 1.66) | 0.46        |
| Drinking status                         |                              |                   |             |                   |             |
| Never                                   | 64 (10.4)                    | Ref               | -           | Ref               | -           |
| Quitted                                 | 4 (13.3)                     | 1.33 (0.45, 3.93) | 0.61        | 2.46 (0.68, 8.85) | 0.17        |
| Yes                                     | 12 (8.0)                     | 0.75 (0.39, 1.43) | 0.38        | 1.11 (0.51, 2.42) | 0.78        |
| Smoking status                          |                              |                   |             |                   |             |
| Never                                   | 74 (10.0)                    | Ref               | -           | Ref               | -           |
| Quitted                                 | 4 (11.8)                     | 1.20 (0.41, 3.50) | 0.74        | 0.58 (0.17, 2.00) | 0.39        |
| Yes                                     | 2 (8.7)                      | 0.86 (0.20, 3.73) | 0.84        | 1.41 (0.27, 7.36) | 0.68        |
| Insomnia (PSQI score >5)                |                              |                   |             |                   |             |
| Optimal ≤= 5                            | 42 (8.4)                     | Ref               | -           | Ref               | -           |
| Poor > 5                                | 38 (12.8)                    | 1.61 (1.01, 2.56) | 0.04        | 2.00 (1.17, 3.45) | 0.01        |
| Model 2b                                |                              |                   |             |                   |             |
| Lifestyle score                         | -                            | 0.61 (0.51, 0.73) | < 0.001     | 0.63 (0.52, 0.78) | < 0.001     |

VPA: Vigorous physical activity; MPA: moderate physical activity; PSQI: Pittsburg Sleep Quality Index.

Model 1 was univariate logistic regression model, one regression model only included one lifestyle factor or lifestyle score as the independent variable; crude OR was calculated; Model 2a was multivariable logistic regression model, BMI, VPA, MPA, drinking status, smoking status, insomnia were put in one model for analysis, with adjustment of gender, age, employment status, education level, marital status, and monthly family income. Model 2b was multivariable logistic regression model, lifestyle score was put in the model for analysis, with adjustment of gender, age, employment status, education level, marital status, and monthly family income.

**Table S3.** Associations between lifestyle factors and lifestyle score and multimorbidity among Macau population stratified by age.

| Lifestyle characteristics               | Multimorbidity,<br>cases (%) | age < 45 y         |                |                    |                |
|-----------------------------------------|------------------------------|--------------------|----------------|--------------------|----------------|
|                                         |                              | Model 1            |                | Model 2            |                |
|                                         |                              | OR (95% CI)        | P-<br>value    | OR (95% CI)        | P-<br>value    |
|                                         |                              | Model 2a           |                |                    |                |
| <b>BMI category</b>                     |                              |                    |                |                    |                |
| Underweight/Normal weight (<23.0 kg/m2) | 6 (1.2)                      | Ref                | -              | Ref                | -              |
| Overweight (23-24.9 kg/m2)              | 2 (2.1)                      | 1.70 (0.34, 8.56)  | 0.52           | 1.30 (0.20, 8.26)  | 0.78           |
| Obesity (≥25 kg/m2)                     | 6 (5.6)                      | 4.75 (1.50, 15.04) | 0.008          | 6.88 (1.68, 28.12) | 0.007          |
| <b>VPA Weekly</b>                       |                              |                    |                |                    |                |
| Not enough (< 75 min)                   | 14 (2.7)                     | Ref                | -              | Ref                | -              |
| Enough (≥ 75 min)                       | 0 (0.0)                      | – <sup>c</sup>     | – <sup>c</sup> | – <sup>c</sup>     | – <sup>c</sup> |
| <b>MPA Weekly</b>                       |                              |                    |                |                    |                |
| Not enough (< 150 min)                  | 14 (2.6)                     | Ref                | -              | Ref                | -              |
| Enough (≥ 150 min)                      | 0 (0.0)                      | – <sup>c</sup>     | – <sup>c</sup> | – <sup>c</sup>     | – <sup>c</sup> |
| <b>Drinking status</b>                  |                              |                    |                |                    |                |
| Never                                   | 9 (2.0)                      | Ref                | -              | Ref                | -              |
| Quitted                                 | 1 (3.0)                      | 1.55 (0.19, 12.61) | 0.68           | 1.49 (0.12, 18.98) | 0.76           |
| Yes                                     | 4 (1.9)                      | 0.97 (0.30, 3.19)  | 0.96           | 0.80 (0.18, 3.62)  | 0.77           |
| <b>Smoking status</b>                   |                              |                    |                |                    |                |
| Never                                   | 11 (1.8)                     | Ref                | -              | Ref                | -              |
| Quitted                                 | 2 (6.9)                      | 4.10 (0.87, 19.42) | 0.08           | 2.65 (0.29, 23.91) | 0.38           |
| Yes                                     | 1 (2.1)                      | 1.20 (0.15, 9.53)  | 0.86           | 0.79 (0.05, 11.98) | 0.86           |
| <b>Insomnia (PSQI score &gt;5)</b>      |                              |                    |                |                    |                |
| Optimal ≤ 5                             | 6 (1.3)                      | Ref                | -              | Ref                | -              |
| Poor > 5                                | 8 (3.5)                      | 2.74 (0.94, 8.01)  | 0.06           | 2.48 (0.68, 9.06)  | 0.17           |
| <b>Model 2b</b>                         |                              |                    |                |                    |                |
| Lifestyle score                         | -                            | 0.45 (0.31, 0.64)  | < 0.001        | 0.49 (0.32, 0.74)  | < 0.001        |

**Table S3. Associations between lifestyle factors and lifestyle score and multimorbidity among Macau population stratified by age (Continued)**

|                                         | age >= 45 y                  |                   |         |                   |         |
|-----------------------------------------|------------------------------|-------------------|---------|-------------------|---------|
| Lifestyle characteristics               | Multimorbidity,<br>cases (%) | Model 1           |         | Model 2           |         |
|                                         |                              | OR (95% CI)       | P-value | OR (95% CI)       | P-value |
|                                         |                              |                   |         | Model 2a          |         |
| <b>BMI category</b>                     |                              |                   |         |                   |         |
| Underweight/Normal weight (<23.0 kg/m2) | 44 (11.5)                    | Ref               | -       | Ref               | -       |
| Overweight (23-24.9 kg/m2)              | 37 (19.9)                    | 1.91 (1.18, 3.08) | 0.008   | 2.20 (1.31, 3.69) | 0.003   |
| Obesity (≥25 kg/m2)                     | 54 (30.2)                    | 3.32 (2.12, 5.19) | < 0.001 | 3.48 (2.13, 5.68) | < 0.001 |
| <b>VPA Weekly</b>                       |                              |                   |         |                   |         |
| Not enough (< 75 min)                   | 116 (18.0)                   | Ref               | -       | Ref               | -       |
| Enough (>= 75 min)                      | 19 (18.4)                    | 1.03 (0.60, 1.76) | 0.92    | 1.10 (0.57, 2.13) | 0.77    |
| <b>MPA Weekly</b>                       |                              |                   |         |                   |         |
| Not enough (< 150 min)                  | 108 (17.8)                   | Ref               | -       | Ref               | -       |
| Enough (>= 150 min)                     | 27 (19.3)                    | 1.10 (0.69, 1.76) | 0.68    | 1.12 (0.62, 2.01) | 0.71    |
| <b>Drinking status</b>                  |                              |                   |         |                   |         |
| Never                                   | 82 (15.6)                    | Ref               | -       | Ref               | -       |
| Quitted                                 | 21 (32.8)                    | 2.64 (1.49, 4.69) | < 0.001 | 2.43 (1.22, 4.83) | 0.01    |
| Yes                                     | 32 (20.4)                    | 1.39 (0.88, 2.18) | 0.16    | 1.42 (0.82, 2.46) | 0.22    |
| <b>Smoking status</b>                   |                              |                   |         |                   |         |
| Never                                   | 99 (17.1)                    | Ref               | -       | Ref               | -       |
| Quitted                                 | 25 (25.5)                    | 1.66 (1.01, 2.75) | 0.05    | 1.12 (0.61, 2.06) | 0.71    |
| Yes                                     | 11 (15.9)                    | 0.92 (0.47, 1.82) | 0.81    | 0.73 (0.32, 1.67) | 0.46    |
| <b>Insomnia (PSQI score &gt;5)</b>      |                              |                   |         |                   |         |
| Optimal <= 5                            | 77 (15.0)                    | Ref               | -       | Ref               | -       |
| Poor > 5                                | 58 (24.7)                    | 1.85 (1.26, 2.72) | 0.002   | 2.04 (1.32, 3.17) | 0.001   |
|                                         |                              |                   |         | Model 2b          |         |
| <b>Lifestyle score</b>                  | -                            | 0.76 (0.66, 0.86) | < 0.001 | 0.73 (0.63, 0.84) | < 0.001 |

VPA: Vigorous physical activity; MPA: moderate physical activity; PSQI: Pittsburg Sleep Quality Index.

Model 1 was univariate logistic regression model, one regression model only included one lifestyle factor or lifestyle score as the independent variable; crude OR was calculated.

Model 2a was multivariable logistic regression model, BMI, VPA, MPA, drinking status, smoking status, insomnia were put in one model for analysis, with adjustment of gender, age, employment status, education level, marital status, and monthly family income.

Model 2b was multivariable logistic regression model, lifestyle score was put in the model for analysis, with adjustment of gender, age, employment status, education level, marital status, and monthly family income.

<sup>c</sup> the result was not reported due to the absence of multimorbidity case.

**Table S4.** Sensitivity analysis of associations between lifestyle factors and lifestyle score and multimorbidity among Macau population by excluding people with only one chronic disease.

| Lifestyle characteristics                            | Multimorbidity, cases (%) | Model 1           |         | Model 2           |         |
|------------------------------------------------------|---------------------------|-------------------|---------|-------------------|---------|
|                                                      |                           | OR (95% CI)       | P-value | OR (95% CI)       | P-value |
|                                                      |                           |                   |         | Model 2a          |         |
| <b>BMI category</b>                                  |                           |                   |         |                   |         |
| Underweight/Normal weight (<23.0 kg/m <sup>2</sup> ) | 50 (6.9)                  | Ref               | -       | Ref               | -       |
| Overweight (23-24.9 kg/m <sup>2</sup> )              | 39 (18.1)                 | 3.01 (1.92, 4.72) | < 0.001 | 2.39 (1.38, 4.14) | 0.002   |
| Obesity (≥25 kg/m <sup>2</sup> )                     | 60 (28.2)                 | 5.33 (3.52, 8.06) | < 0.001 | 5.08 (3.04, 8.48) | < 0.001 |
| <b>VPA Weekly</b>                                    |                           |                   |         |                   |         |
| Not enough (< 75 min)                                | 130 (14.3)                | Ref               | -       | Ref               | -       |
| Enough (≥ 75 min)                                    | 19 (7.8)                  | 0.51 (0.31, 0.84) | 0.008   | 0.71 (0.37, 1.38) | 0.31    |
| <b>MPA Weekly</b>                                    |                           |                   |         |                   |         |
| Not enough (< 150 min)                               | 122 (13.5)                | Ref               | -       | Ref               | -       |
| Enough (≥ 150 min)                                   | 27 (10.8)                 | 0.77 (0.50, 1.21) | 0.26    | 0.95 (0.52, 1.74) | 0.87    |
| <b>Drinking status</b>                               |                           |                   |         |                   |         |
| Never                                                | 91 (11.6)                 | Ref               | -       | Ref               | -       |
| Quitted                                              | 22 (31.4)                 | 3.50 (2.02, 6.06) | < 0.001 | 2.39 (1.12, 5.11) | 0.02    |
| Yes                                                  | 36 (11.9)                 | 1.03 (0.68, 1.56) | 0.88    | 1.01 (0.57, 1.76) | 0.98    |
| <b>Smoking status</b>                                |                           |                   |         |                   |         |
| Never                                                | 110 (11.2)                | Ref               | -       | Ref               | -       |
| Quitted                                              | 27 (29.3)                 | 3.28 (2.01, 5.36) | < 0.001 | 0.96 (0.48, 1.91) | 0.9     |
| Yes                                                  | 12 (14.0)                 | 1.28 (0.67, 2.43) | 0.45    | 0.82 (0.34, 1.94) | 0.65    |
| <b>Insomnia (PSQI score &gt;5)</b>                   |                           |                   |         |                   |         |

---

|                        |           |                   |         |                   |         |
|------------------------|-----------|-------------------|---------|-------------------|---------|
| Optimal ≤ 5            | 83 (10.8) | Ref               | -       | Ref               | -       |
| Poor > 5               | 66 (17.1) | 1.71 (1.21, 2.42) | 0.003   | 2.26 (1.44, 3.57) | < 0.001 |
|                        |           |                   |         | <b>Model 2b</b>   |         |
| <b>Lifestyle score</b> | -         | 0.60 (0.53, 0.68) | < 0.001 | 0.64 (0.55, 0.74) | < 0.001 |

---

VPA: Vigorous physical activity; MPA: moderate physical activity; PSQI: Pittsburg Sleep Quality Index.

Model 1 was univariate logistic regression model, one regression model only included one lifestyle factor or lifestyle score as the independent variable; crude OR was calculated.

Model 2a was multivariable logistic regression model, BMI, VPA, MPA, drinking status, smoking status, insomnia were put in one model for analysis, with adjustment of gender, age, employment status, education level, marital status, and monthly family income.

Model 2b was multivariable logistic regression model, lifestyle score was put in the model for analysis, with adjustment of gender, age, employment status, education level, marital status, and monthly family income.



**Table S5.** Sensitivity analysis of associations between lifestyle factors and lifestyle score and multimorbidity among Macau population by excluding people who had no chronic disease.

| Lifestyle characteristics                                  | Multimorbidity,<br>cases (%) | Model 1           |           | Model 2           |         |
|------------------------------------------------------------|------------------------------|-------------------|-----------|-------------------|---------|
|                                                            |                              | OR (95% CI)       | P-value   | OR (95% CI)       | P-value |
|                                                            |                              |                   |           | Model 2a          |         |
| <b>BMI category</b>                                        |                              |                   |           |                   |         |
| Underweight/Normal weight<br>( $<23.0$ kg/m <sup>2</sup> ) | 50 (25.8)                    | Ref               | -         | Ref               | -       |
| Overweight (23-24.9 kg/m <sup>2</sup> )                    | 39 (36.4)                    | 1.65 (0.99, 2.75) | 0.05      | 1.43 (0.81, 2.52) | 0.22    |
| Obesity ( $\geq 25$ kg/m <sup>2</sup> )                    | 60 (44.8)                    | 2.34 (1.46, 3.73) | $< 0.001$ | 2.12 (1.26, 3.58) | 0.005   |
| <b>VPA Weekly</b>                                          |                              |                   |           |                   |         |
| Not enough ( $< 75$ min)                                   | 130 (34.7)                   | Ref               | -         | Ref               | -       |
| Enough ( $\geq 75$ min)                                    | 19 (31.7)                    | 0.87 (0.49, 1.57) | 0.65      | 0.93 (0.45, 1.90) | 0.83    |
| <b>MPA Weekly</b>                                          |                              |                   |           |                   |         |
| Not enough ( $< 150$ min)                                  | 122 (34.2)                   | Ref               | -         | Ref               | -       |
| Enough ( $\geq 150$ min)                                   | 27 (34.6)                    | 1.02 (0.61, 1.71) | 0.94      | 1.03 (0.55, 1.92) | 0.93    |
| <b>Drinking status</b>                                     |                              |                   |           |                   |         |
| Never                                                      | 91 (31.7)                    | Ref               | -         | Ref               | -       |
| Quitted                                                    | 22 (44.9)                    | 1.75 (0.95, 3.25) | 0.07      | 2.56 (1.22, 5.39) | 0.01    |
| Yes                                                        | 36 (36.4)                    | 1.23 (0.76, 1.99) | 0.4       | 1.87 (1.02, 3.42) | 0.04    |
| <b>Smoking status</b>                                      |                              |                   |           |                   |         |
| Never                                                      | 110 (33.2)                   | Ref               | -         | Ref               | -       |
| Quitted                                                    | 27 (43.5)                    | 1.55 (0.89, 2.69) | 0.12      | 1.30 (0.67, 2.54) | 0.44    |
| Yes                                                        | 12 (28.6)                    | 0.80 (0.40, 1.63) | 0.54      | 0.63 (0.26, 1.48) | 0.29    |
| <b>Insomnia (PSQI score <math>&gt; 5</math>)</b>           |                              |                   |           |                   |         |

---

|                        |           |                   |         |                   |         |
|------------------------|-----------|-------------------|---------|-------------------|---------|
| Optimal ≤ 5            | 83 (28.7) | Ref               | -       | Ref               | -       |
| Poor > 5               | 66 (45.2) | 2.05 (1.35, 3.10) | < 0.001 | 2.46 (1.53, 3.95) | < 0.001 |
|                        |           |                   |         | <b>Model 2b</b>   |         |
| <b>Lifestyle score</b> | -         | 0.77 (0.68, 0.88) | < 0.001 | 0.76 (0.66, 0.88) | < 0.001 |

---

VPA: Vigorous physical activity; MPA: moderate physical activity; PSQI: Pittsburg Sleep Quality Index.

Model 1 was univariate logistic regression model, one regression model only included one lifestyle factor or lifestyle score as the independent variable; crude OR was calculated.

Model 2a was multivariable logistic regression model, BMI, VPA, MPA, drinking status, smoking status, insomnia were put in one model for analysis, with adjustment of gender, age, employment status, education level, marital status, and monthly family income.

Model 2b was multivariable logistic regression model, lifestyle score was put in the model for analysis, with adjustment of gender, age, employment status, education level, marital status, and monthly family income.

**Table S6.** Sensitivity analysis of associations between lifestyle factors and multimorbidity among Macau population by including total physical activity in the multivariable model.

| <b>Lifestyle characteristics</b>                     | <b>OR (95% CI)</b> | <b>P-value</b> |
|------------------------------------------------------|--------------------|----------------|
| <b>BMI category</b>                                  |                    |                |
| Underweight/Normal weight (<23.0 kg/m <sup>2</sup> ) | Ref                | -              |
| Overweight (23-24.9 kg/m <sup>2</sup> )              | 1.95 (1.18, 3.20)  | 0.009          |
| Obesity (≥25 kg/m <sup>2</sup> )                     | 3.80 (2.40, 6.02)  | < 0.001        |
| <b>TOPA Weekly</b>                                   |                    |                |
| Not enough (< 150 min)                               | Ref                | -              |
| Enough (≥ 150 min)                                   | 0.82 (0.51, 1.31)  | 0.4            |
| <b>Drinking status</b>                               |                    |                |
| Never                                                | Ref                | -              |
| Quitted                                              | 2.45 (1.27, 4.72)  | 0.008          |
| Yes                                                  | 1.35 (0.81, 2.25)  | 0.26           |
| <b>Smoking status</b>                                |                    |                |
| Never                                                | Ref                | -              |
| Quitted                                              | 1.18 (0.65, 2.12)  | 0.59           |
| Yes                                                  | 0.75 (0.35, 1.64)  | 0.48           |
| <b>Insomnia (PSQI score &gt;5)</b>                   |                    |                |
| Optimal ≤ 5                                          | Ref                | -              |
| Poor > 5                                             | 2.25 (1.49, 3.40)  | < 0.001        |

VPA: Vigorous physical activity; TOPA weekly: weekly total physical activity; PSQI: Pittsburg Sleep Quality Index.

Multivariable logistic regression model, BMI, VPA, MPA, drinking status, smoking status, insomnia were put in one model for analysis, with adjustment of gender, age, employment status, education level, marital status, and monthly family income.
